# Supplementary material for: Identification of Messenger RNA Signatures in Age-Dependent Renal Impairment
Source: MDPI journal article supplement (doi:10.3390/diagnostics13243653), 2023-12-13
Supplement: s1 [file s1]

**Table S1.** The mRNAs whose expressions were significantly higher (by >2.0 times) in SAMP1-50wk mouse kidneys compared to SAMR1-10wk, SAMR1-50wk, and SAMP1 50wk mouse kidneys by microarray

| Gene symbol   | GenBank<br>accession no. | Chromosome<br>no. | SAMR1-10wk<br>vs.<br>SAMR1-50wk | SAMR1-10wk<br>vs.<br>SAMP1-10wk | SAMR1-10wk<br>vs.<br>SAMP1-50wk | p-value,<br>ANOVA |
|---------------|--------------------------|-------------------|---------------------------------|---------------------------------|---------------------------------|-------------------|
| A530032D15Rik | NM_213615                | chr1              | 1.27                            | -1.16                           | 2.99                            | <0.01             |
| Acox2         | NM_053115                | chr14             | 1.08                            | -1.75                           | -3.81                           | <0.01             |
| Apoc2         | NM_001277944             | chr7              | -1.13                           | -1.00                           | 2.24                            | 0.019             |
| Batf          | NM_016767                | chr12             | 1.17                            | 1.05                            | 3.03                            | <0.01             |
| Card11        | NM_175362                | chr5              | -1.02                           | 1.10                            | 2.48                            | <0.01             |
| Cd2           | ENSMUST00000029456.4     | chr3              | 1.05                            | 1.42                            | 5.34                            | <0.01             |
| Cd19          | NM_001357091             | chr7              | -1.32                           | -1.19                           | 5.00                            | <0.01             |
| Cd37          | NM_001290802             | chr7              | 1.39                            | 1.28                            | 2.81                            | <0.01             |
| Cd52          | NM_013706                | chr4              | 1.43                            | 1.65                            | 3.39                            | <0.01             |
| Cd79b         | NM_008339                | chr11             | 1.73                            | 1.23                            | 4.45                            | <0.01             |
| Cd83          | NM_009856                | chr13             | 1.15                            | 1.23                            | 2.70                            | 0.016             |
| Ceacam16      | NM_001033419             | chr7              | -1.28                           | -2.85                           | 2.18                            | <0.01             |
| Cenpf         | NM_001081363             | chr1              | -1.94                           | -1.94                           | -5.63                           | <0.01             |
| Comp          | NM_016685                | chr8              | 1.93                            | 1.79                            | 7.20                            | <0.01             |
| Csf2rb2       | NM_007781                | chr15             | 1.20                            | 1.13                            | 2.44                            | <0.01             |
| Csprs         | NM_033616                | chr8              | 1.81                            | 1.48                            | 4.44                            | <0.01             |
| Dock2         | ENSMUST00000157036.1     | chr11             | -1.14                           | -1.01                           | 2.57                            | <0.01             |
| Dtx1          | NM_008052                | chr5              | 1.07                            | 1.11                            | 2.29                            | 0.017             |
| Fcmmr         | NM_026976                | chr1              | 2.15                            | 1.53                            | 7.12                            | <0.01             |
| Gm10050       | AK047630                 | chr15             | -1.35                           | -1.79                           | -3.61                           | <0.01             |
| H2-Oa         | NM_008206                | chr17             | 1.56                            | 2.03                            | 4.71                            | <0.01             |
| Ikzf3         | ENSMUST00000140876.1     | chr11             | 1.78                            | 1.60                            | 5.39                            | <0.01             |
| IL-1b         | NM_008361                | chr2              | -1.24                           | -1.84                           | 3.26                            | <0.01             |
| LOC664787     | NR_131980                | chr8              | 2.99                            | 1.47                            | 10.2                            | <0.01             |

|               |              |       |       |       |       |       |
|---------------|--------------|-------|-------|-------|-------|-------|
| Ltb           | NM_008518    | chr17 | 1.46  | 1.56  | 5.13  | <0.01 |
| Lyz1          | NM_013590    | chr10 | 1.38  | 1.48  | 3.06  | <0.01 |
| Mir142hg      | AK020764     | chr11 | 1.06  | -1.08 | 2.16  | <0.01 |
| Mmp3          | NM_010809    | chr9  | -1.73 | -1.28 | 7.39  | <0.01 |
| Ms4a1         | NM_007641    | chr19 | 2.42  | -1.51 | 17.2  | <0.01 |
| Ncf1          | NM_001286037 | chr5  | -1.12 | 1.03  | 2.06  | <0.01 |
| Npy6r         | NM_010935    | chr18 | -2.01 | -2.43 | -14.6 | <0.01 |
| Nr4a1         | NM_010444    | chr15 | 1.23  | 1.38  | 5.49  | <0.01 |
| Pcdh7         | NM_018764    | chr5  | -1.34 | -2.59 | -8.39 | <0.01 |
| Pla2g2d       | NM_011109    | chr4  | 1.51  | -1.00 | 3.69  | <0.01 |
| Runx3         | NM_001369050 | chr4  | 1.03  | 1.11  | 3.80  | <0.01 |
| Samsn1        | NM_023380    | chr16 | 1.21  | 1.38  | 3.24  | 0.015 |
| Serpina3n     | NM_009252    | chr12 | 1.81  | 1.73  | 11.5  | <0.01 |
| Slc7a12       | NM_080852    | chr3  | -1.06 | -1.94 | 2.63  | <0.01 |
| S100g         | NM_009789    | chrX  | -1.51 | -1.64 | -5.18 | <0.01 |
| Tnfrsf13c     | NM_0028075   | chr15 | 1.01  | -1.14 | 18.3  | <0.01 |
| Wfdc3         | NM_027961    | chr2  | -1.30 | 1.12  | -3.14 | <0.01 |
| Zap70         | NM_001289765 | chr1  | 1.03  | 1.99  | 4.43  | <0.01 |
| 4931414P19Rik | NM_028890    | chr14 | -1.03 | -1.18 | -4.88 | 0.013 |
| 4921532D01Rik | NM_028890    | chr14 | -1.27 | -1.29 | -3.36 | <0.01 |

The data of the SAMR1-10wk group are used as the reference value (1.0). Acox2: acyl-Coenzyme A oxidase 2, branched chain, Apoc2: apolipoprotein C-II, Batf: basic leucine zipper ATF like transcription factor, Card11: caspase recruitment domain family, member 11, Cenpf: centromere protein F, Comp: cartilage oligomeric matrix protein, Csf2rb2: colony stimulating factor 2 receptor, beta 2, Csprs: component of Sp100-rs, Dock2: dedicator of cyto-kinesis 2, Dtx1: deltex 1, Fcmmr: Fc mu receptor, Irf3: IKAROS family zinc finger 3, IL-1b: interleukin-1b, Ltb: lymphotoxin b, Lyz1: lysozyme 1, Mir142hg: mir142 host gene, mmp3: matrix metalloproteinase, mRNA: messenger RNA, Ms4a1: membrane-spanning 4-domains, subfamily A, member 1, Ncf1: neutrophil cytosolic factor 1, Npy6r: neuropeptide Y receptor Y6, Nr4a1: nuclear receptor subfamily 4, group A, member 1, Pcdh7: Protocadherin 7, Pla2g2d: phospholipase A2 group IID, Runx3: runt related transcription factor 3, S100g: S100 calcium binding protein G, SAMP: senescence-accelerated mouse prone, SAMR: senescence-accelerated mouse resistant, Samsn1: SAM domain, SH3 domain and nuclear localization signals, 1, Serpina3n: serine (or cysteine) peptidase inhibitor, clade A, member 3N, Slc7a12: solute carrier family 7 member 12, Tnfrsf13c: tumor necrosis factor receptor superfamily member 13c, Wfdc3: WAP four-disulfide core domain 3, wk: weeks old, Zap70: zeta-chain associated protein kinase.

**Table S2.** List of mRNAs differentially expressed in the kidneys of SAM mice and associated known signaling pathways

| Pathway                                        | Gene symbol | SAMR1-10wk<br>vs.<br>SAMR1-50wk | SAMR1-10wk<br>vs.<br>SAMP1-10wk | SAMR1-10wk<br>vs.<br>SAMP1-50wk | p-value,<br>ANOVA |
|------------------------------------------------|-------------|---------------------------------|---------------------------------|---------------------------------|-------------------|
| Alzheimer's disease                            | IL-1b       | -1.24                           | -1.84                           | 3.26                            | <0.01             |
| Burn wound healing                             | IL-1b       | -1.24                           | -1.84                           | 3.26                            | <0.01             |
| Cytokines and inflammatory response            | IL-1b       | -1.24                           | -1.84                           | 3.26                            | <0.01             |
| IL-1 signaling pathway                         | IL-1b       | -1.24                           | -1.84                           | 3.26                            | <0.01             |
| Immune response in Tg26 glomeruli              | IL-1b       | -1.24                           | -1.84                           | 3.26                            | <0.01             |
| Lung fibrosis                                  | IL-1b       | -1.24                           | -1.84                           | 3.26                            | <0.01             |
| Mapk signaling pathway                         | IL-1b       | -1.24                           | -1.84                           | 3.26                            | <0.01             |
| Myometrial relaxation and contraction pathways | IL-1b       | -1.24                           | -1.84                           | 3.26                            | <0.01             |
| Toll-like receptor signaling pathway           | IL-1b       | -1.24                           | -1.84                           | 3.26                            | <0.01             |
| Type II interferon signaling                   | IL-1b       | -1.24                           | -1.84                           | 3.26                            | <0.01             |
| Tyrobp causal network in microglia             | Cd37        | 1.39                            | 1.28                            | 2.81                            | <0.01             |
| Nuclear_Receptors                              | Nr4a1       | 1.23                            | 1.38                            | 5.49                            | <0.01             |
| Spinal cord injury                             | Nr4a1       | 1.23                            | 1.38                            | 5.49                            | <0.01             |
| Delta-Notch signaling pathway                  | Dtx1        | 1.07                            | 1.11                            | 2.29                            | 0.02              |
| Notch signaling pathway                        | Dtx1        | 1.07                            | 1.11                            | 2.29                            | 0.02              |
| Focal adhesion PI3K-Akt-mTOR_signaling_pathway | Comp        | 1.93                            | 1.79                            | 7.20                            | <0.01             |

The data of the SAMR1-10wk group are used as the reference value (1.0). Comp: cartilage oligomeric matrix protein, Dtx1: deltex 1, IL-1b: interleukin-1b, mRNA: messenger RNA, Nr4a1: nuclear receptor subfamily 4, group A, member 1, SAMP: senescence-accelerated mouse prone, SAMR: senescence-accelerated mouse resistant, wk: weeks old.
